# Supplementary material
Source: Springer Nature journal article supplement (https://www.springermedizin.de/resource/supplementary/12967_2010_740_MOESM8_ESM.pdf/9577404)

A

### KG1a

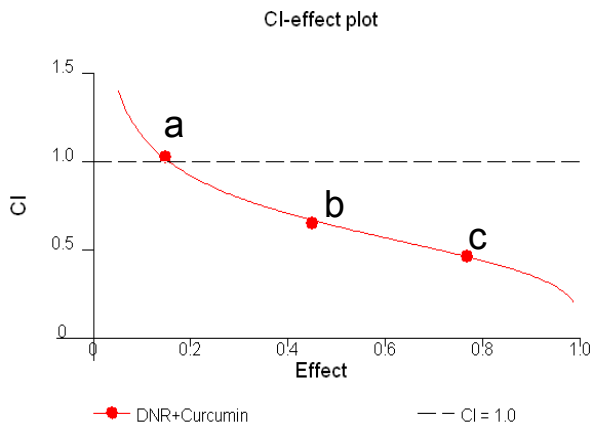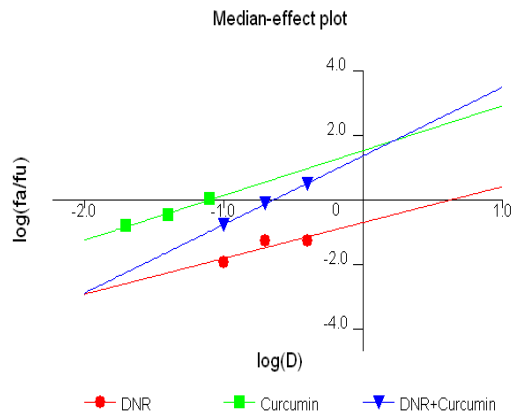

B

### Kasumi-1

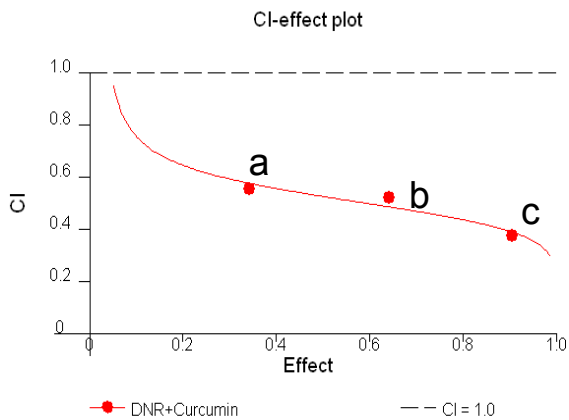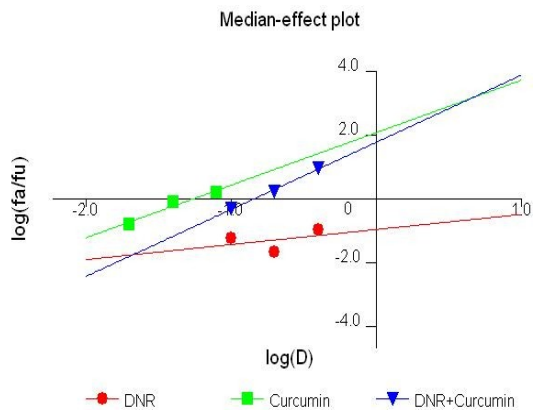

C

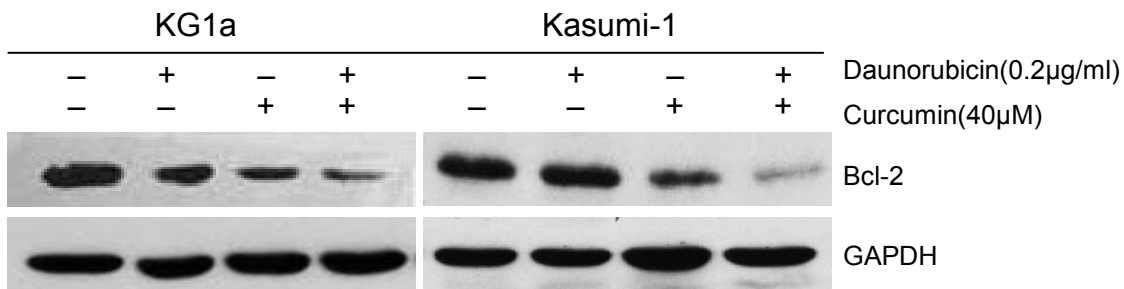

Supplement: MOESM8 [file 9577404]
